# Supplementary material
Source: HighWire-hosted journal article supplement (https://bmjopen.bmj.com/content/9/7/e027971)
Supplement: inline-supplementary-material-1 [file inline-supplementary-material-1.pdf]

1. 禁煙支援のための基礎知識

- ・ 貴学における禁煙支援の基礎知識に関する講義等について、平成25年度改訂薬学教育モデル・コアカリキュラム(以降新コアカリ)における実施状況(5・6年は予定)についてお答えください。
- ・ 未実施の項目については、履修学年「なし」を選択していただければ、他の項目は未記入で構いません。
- ・ 複数の学年で実施している場合には、おもに実施している学年を優先してお答えください。

|                                                 | 履修学年                  | 必修・選択・自由             | 講義・実習・演習など                        |
|-------------------------------------------------|-----------------------|----------------------|-----------------------------------|
|                                                 | 該当する数字・文字<br>を選んでください | 1 必修<br>2 選択<br>3 自由 | 1 講義 2 実習<br>3 演習 4 実務実習<br>5 その他 |
| 1 日本における喫煙率の現状と推移                               | <input type="text"/>  | <input type="text"/> | <input type="text"/>              |
| 2 能動喫煙による健康への影響                                 | <input type="text"/>  | <input type="text"/> | <input type="text"/>              |
| 3 受動喫煙による健康への影響                                 | <input type="text"/>  | <input type="text"/> | <input type="text"/>              |
| 4 日本で使用されているタバコ製品                               | <input type="text"/>  | <input type="text"/> | <input type="text"/>              |
| 5 ニコチンの薬理学的作用                                   | <input type="text"/>  | <input type="text"/> | <input type="text"/>              |
| 6 ニコチン依存症の病態メカニズム                               | <input type="text"/>  | <input type="text"/> | <input type="text"/>              |
| 7 禁煙補助薬(ニコチンパッチ・ガム、バレニクリン)の特徴(薬理、副作用、用法用量、禁忌など) | <input type="text"/>  | <input type="text"/> | <input type="text"/>              |
| 8 喫煙と相互作用のある医薬品                                 | <input type="text"/>  | <input type="text"/> | <input type="text"/>              |
| 9 禁煙によるニコチン離脱症状と健康上の利点                          | <input type="text"/>  | <input type="text"/> | <input type="text"/>              |

特記事項:

\* 2. 上記、禁煙支援の基礎知識を担当する教員を全て選択してください(複数選択可能)。

該当項目に

|                                       | 常勤                       | 非常勤                      |
|---------------------------------------|--------------------------|--------------------------|
| 1 日本禁煙学会認定専門家または指導者                   | <input type="checkbox"/> | <input type="checkbox"/> |
| 2 上記以外の実務家教員(おおむね5年以上の薬剤師としての経験を有する者) | <input type="checkbox"/> | <input type="checkbox"/> |
| 3 医師                                  | <input type="checkbox"/> | <input type="checkbox"/> |
| 4 保健師・看護師                             | <input type="checkbox"/> | <input type="checkbox"/> |
| 5 大学教員その他                             | <input type="checkbox"/> | <input type="checkbox"/> |

### 3. 禁煙治療実践のための知識・技能

- ・ 貴学における禁煙治療に関する講義等の新コアカリにおける実施状況(5・6年は予定)をお答えください。
- ・ 未実施の項目については、履修学年「なし」を選択していただければ、他の項目は未記入で構いません。
- ・ 複数の学年で実施している場合には、おもに実施している学年を優先してお答えください。

略語の説明:

1 「5Aアプローチ」(Ask, Advise, Assess, Assist, Arrange):

喫煙者が禁煙を希望するかどうかを尋ね(Ask)、今すぐに(1ヵ月以内に)禁煙しようと考えている喫煙者に対して禁煙支援を行う手順のこと。

2 「5Rアプローチ」(Relevance, Risks, Rewards, Roadblocks, Repetition):

禁煙を考えていない喫煙者に対して、禁煙への動機づけを行う手順のこと。

3 「ABR」(Ask, Brief advice, Refer):

健診会場など、禁煙支援の時間が確保できない場合に行う短時間の禁煙支援の手順のこと。

4 喫煙者の禁煙の準備性に関する定義:

前熟考期「禁煙に関心がない」または「禁煙に関心はあるが、今後6ヵ月以内に禁煙しようとは考えていない」

熟考期「今後6ヵ月以内に禁煙しようと考えているが、直ちに(1ヵ月以内に)禁煙する考えはない」

準備期「直ちに(1ヵ月以内に)禁煙しようと考えている」

5 加熱式タバコ:

電子制御機器と組み合わせて、たばこ葉あるいはその加工したものを、燃焼させずに電氣的に加熱して発生するニコチンを吸入する新しいタイプのタバコ製品。(商品名:iQOS、glo、Ploom Tech)

6 電子タバコ:

ニコチン配合または非配合の溶液を加熱して煙霧を発生させ、吸入するための製品。

国内では、ニコチンを含有する電子たばこは、医薬品医療機器等法で規制され、日本では販売が許可されていない。

ニコチンを含まない電子たばこは、たばこ事業法のたばことして分類されず、未成年を含む若年者も購入可能である。

|                                                                                           | 履修学年                       | 必修・選択・自由             | 講義・実習・演習など                        |
|-------------------------------------------------------------------------------------------|----------------------------|----------------------|-----------------------------------|
| <b>該当する数字・文字<br/>を選んでください</b>                                                             | ・1～6(年) または<br>・検討中<br>・なし | 1 必修<br>2 選択<br>3 自由 | 1 講義 2 実習<br>3 演習 4 実務実習<br>5 その他 |
| 1 禁煙カウンセリング:5A アプローチ                                                                      | <input type="text"/>       | <input type="text"/> | <input type="text"/>              |
| 2 禁煙カウンセリング:5Rアプローチ                                                                       | <input type="text"/>       | <input type="text"/> | <input type="text"/>              |
| 3 禁煙カウンセリング:ABRアプローチ                                                                      | <input type="text"/>       | <input type="text"/> | <input type="text"/>              |
| 4 喫煙者の禁煙に対する意識分類:<br>前熟考期、熟考期、準備期                                                         | <input type="text"/>       | <input type="text"/> | <input type="text"/>              |
| 5 認知療法・認知行動療法                                                                             | <input type="text"/>       | <input type="text"/> | <input type="text"/>              |
| 6 動機づけ面接法                                                                                 | <input type="text"/>       | <input type="text"/> | <input type="text"/>              |
| 7 新しいタバコ製品<br>(いわゆる加熱式タバコや電子タバコ)の<br>健康影響                                                 | <input type="text"/>       | <input type="text"/> | <input type="text"/>              |
| 8 禁煙補助薬の使用法の指導                                                                            | <input type="text"/>       | <input type="text"/> | <input type="text"/>              |
| 9 禁煙治療に要する費用                                                                              | <input type="text"/>       | <input type="text"/> | <input type="text"/>              |
| 10 ロールプレシナリオを用いた禁煙支援の<br>実践練習(喫煙者に対する禁煙勧奨、禁煙意欲の<br>確認、患者に合わせた禁煙支援の提案、<br>禁煙実行時のフォローアップなど) | <input type="text"/>       | <input type="text"/> | <input type="text"/>              |

\*4. 上記、禁煙治療実践に関する講義等の担当教員について、該当者を全て選択してください。

・禁煙治療に関する講義等を未実施の場合には、すべて「なし」を選択してください。

該当項目に

|                                           | 常勤                       | 非常勤                      | なし                       |
|-------------------------------------------|--------------------------|--------------------------|--------------------------|
| 1 日本禁煙学会認定専門家または指導者                       | <input type="checkbox"/> | <input type="checkbox"/> | <input type="checkbox"/> |
| 2 上記以外の実務家教員(おおむね5年以上の<br>薬剤師としての経験を有する者) | <input type="checkbox"/> | <input type="checkbox"/> | <input type="checkbox"/> |
| 3 医師                                      | <input type="checkbox"/> | <input type="checkbox"/> | <input type="checkbox"/> |
| 4 保健師・看護師                                 | <input type="checkbox"/> | <input type="checkbox"/> | <input type="checkbox"/> |
| 5 大学教員その他                                 | <input type="checkbox"/> | <input type="checkbox"/> | <input type="checkbox"/> |

\*5. 貴学では、禁煙誘導から薬物療法までの薬剤師による包括的な禁煙支援を、例えば「禁煙支援教育」として、体系的に実施されていますか？

実施中(予定含む)の場合、実施時間についても合わせてお答えください。

該当項目に

1 実施中

実施時間(回数・コマ数・時間など):

2 実施予定

3 実施していない

\*6. 薬学部において、禁煙支援教育は必要ですか？ その理由についてもお聞かせください。

該当項目に

1 必要

2 不要

3 わからない

必要あるいは不要な理由:

## 貴学の喫煙・受動喫煙防止方針について

\*7. 貴学では現在、「禁煙方針」「禁煙支援方針」「受動喫煙防止方針」を策定していますか？

該当項目に○

|          |       |       |             |      |
|----------|-------|-------|-------------|------|
| 禁煙方針     | 1 策定済 | 2 検討中 | 3 検討後、策定見送り | 4未検討 |
| 禁煙支援方針   | 1 策定済 | 2 検討中 | 3 検討後、策定見送り | 4未検討 |
| 受動喫煙防止方針 | 1 策定済 | 2 検討中 | 3 検討後、策定見送り | 4未検討 |

その他:

\*8. 貴学では現在、以下に示した、いわゆる「新しいタバコ」に関する利用規程を定めていますか？

<語句の説明>

無煙タバコ: 製品を加熱・燃焼させることなく使用する「かぎたばこ」や「噛みタバコ」などのタバコ製品。

「かぎたばこ」 カートリッジに充填されたタバコ葉を火を使わずに経口的に吸引する(商品名:ゼロスタイル・スティック)

「噛みたばこ」 タバコ葉を詰めた小袋を口唇と歯茎の間に設置して使用する(商品名:ゼロスタイル・スヌース)

利用規定の有無 該当項目に○

|        |                                       |                       |
|--------|---------------------------------------|-----------------------|
| 無煙タバコ  | 1 規定なし (室内利用可能)<br>3 規定あり (紙巻きタバコと同等) | 2 規定はないが、紙巻きタバコと同様に扱う |
| 加熱式タバコ | 1 規定なし (室内利用可能)<br>3 規定あり (紙巻きタバコと同等) | 2 規定はないが、紙巻きタバコと同様に扱う |
| 電子タバコ  | 1 規定なし (室内利用可能)<br>3 規定あり (紙巻きタバコと同等) | 2 規定はないが、紙巻きタバコと同様に扱う |

その他:

\*9. 貴学の現在の受動喫煙防止対策についてお尋ねします。

<語句の説明> 敷地内全面禁煙・・・大学の敷地・建物いずれも喫煙可能な場所が全くない状態です。  
建物内全面禁煙・・・建物(屋内)はすべて禁煙とするものです。  
建物内原則禁煙・・・建物(屋内)は原則禁煙としますが、例外を設ける場合もあります。

該当項目に○

- 敷地内全面禁煙 → 質問12へお進みください
- 建物内全面禁煙 → 質問10へお進みください
- 建物内原則禁煙 → 質問10へお進みください
- その他:薬学部が他学部と異なる対策を講じている場合など。 → 質問10へお進みください

10. 喫煙所(灰皿設置場所を含む)はどこにありますか？(複数回答可能)

- |                                           |                                               |
|-------------------------------------------|-----------------------------------------------|
| <input type="checkbox"/> 建物外:敷地内出入口(校門など) | <input type="checkbox"/> 建物内:喫煙コーナー(開放～仕切りのみ) |
| <input type="checkbox"/> 建物外:駐輪場、駐車場      | <input type="checkbox"/> 建物内:喫煙室(閉鎖型)         |
| <input type="checkbox"/> 建物外:屋上           | <input type="checkbox"/> その他                  |
| <input type="checkbox"/> 建物外:建物に隣接した出入口   |                                               |

11. 敷地内全面禁煙化について検討したことがありますか？

- 現在検討中
- 検討したが、喫煙場所を残した→その理由を教えてください。

未検討

\* 12. 薬剤師養成を担う教育機関として、学内の敷地内全面禁煙化が望ましいと考えていますか？

- はい
- いいえ
- わからない
- その他ご意見

## 学生や教職員に対する禁煙支援の実施の有無について

\* 13. 貴学では現在、**学生**を対象とした**喫煙予防教育**を実施していますか？

- 実施中→対象学年・実施時期・時間について教えてください。(例:新入生対象・入学時ガイダンス・1コマ(70分)など)

- 過去実施したが、現在実施していない→その理由について、教えてください。

- 未実施

\* 14. 貴学では現在、**喫煙習慣**のある**学生**を対象とした**禁煙教育・支援**を実施していますか？

- 実施中→喫煙学生への禁煙教育・支援の提供内容について教えてください(具体的に)。

- 過去実施したが、現在実施していない→その理由について、教えてください。

- 未実施

\* 15. 貴学では現在、**喫煙習慣**のある**教職員**を対象に、**禁煙支援**を実施していますか？

- 実施中→喫煙教職員への禁煙支援の提供内容について教えてください(具体的に)。

- 過去実施したが、現在実施していない→その理由について、教えてください。

- 未実施

\* 16. 最後に、大学の基礎情報についておたずねします。

貴校は次のどれにあたりますか。 **該当項目に○**

- 1 国立大学
- 2 公立大学
- 3 私立総合大学
- 4 私立単科大学

\* 17. 貴校の所在地(地区)はどちらですか？ **該当項目に○**

- 1 北海道・東北地区 北海道、青森県、秋田県、山形県、岩手県、宮城県、福島県
- 2 関東地区 茨城県、栃木県、群馬県、埼玉県、千葉県、東京都、神奈川県、新潟県、山梨県、長野県
- 3 北陸地区 富山県、石川県、福井県
- 4 東海地区 静岡県、愛知県、岐阜県、三重県
- 5 近畿地区 滋賀県、京都府、大阪府、兵庫県、奈良県、和歌山県
- 6 中国・四国地区 鳥取県、島根県、岡山県、広島県、徳島県、愛媛県、香川県、高知県
- 7 九州・山口地区 山口県、福岡県、佐賀県、長崎県、宮崎県、熊本県、鹿児島県、沖縄県

18. ご協力ありがとうございました。

日本禁煙学会薬剤師委員会では、今回の調査結果を基に、薬学生を対象とした禁煙支援教育プログラムの開発と普及に取り組む予定です。

禁煙支援教育に関心のある先生には今後、直接ご案内を差し上げたいと考えております。よろしければ、貴学の代表となる方の連絡先についてお知らせください(任意)。

大学・研究室名: \_\_\_\_\_

お名前(ふりがな): \_\_\_\_\_

メールアドレス: \_\_\_\_\_
