# Supplementary material
Source: HighWire-hosted journal article supplement (https://bmjopen.bmj.com/content/9/7/e027971)

Supplementary file 2. Flow chart of the study selection.

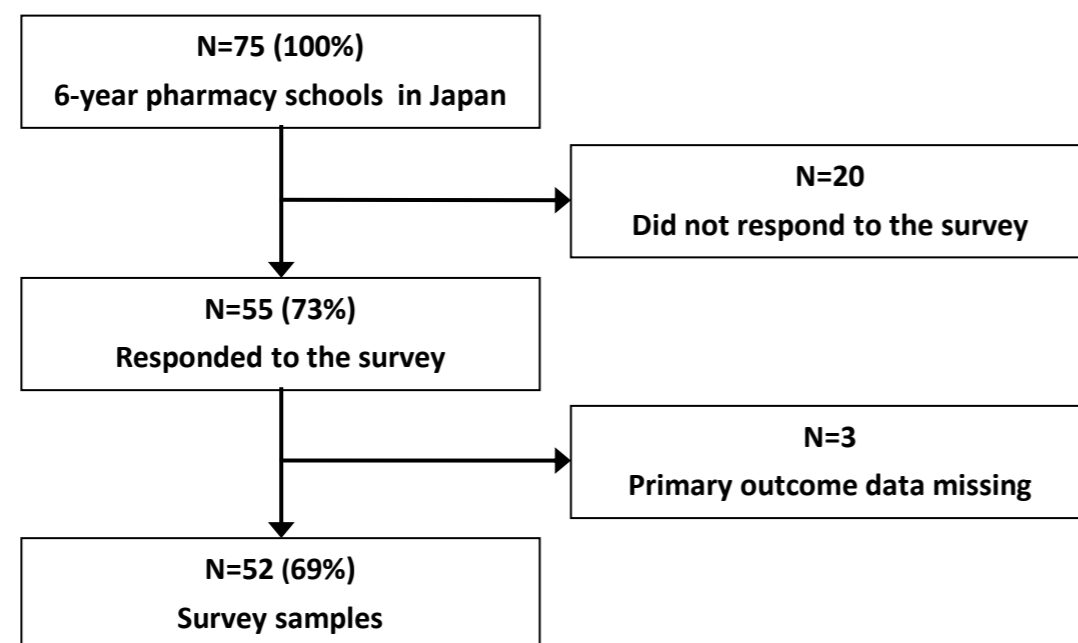

Supplement: inline-supplementary-material-2 [file inline-supplementary-material-2.pdf]
