# Supplementary material
Source: HighWire-hosted journal article supplement (https://bmjopen.bmj.com/content/9/7/e027971)
Supplement: inline-supplementary-material-3 [file inline-supplementary-material-3.pdf]

Supplementary file 3. The curricular coverage of learning topics for tobacco cessation training among subgroups of the perceived importance of tobacco cessation training in responding pharmacy schools in Japan

| Topics                                                                                                  | Model Core Curriculum | total<br>n=52<br>% | 'Should pharmacy education introduce tobacco cessation training?' |                |                       | P value for difference |
|---------------------------------------------------------------------------------------------------------|-----------------------|--------------------|-------------------------------------------------------------------|----------------|-----------------------|------------------------|
|                                                                                                         |                       |                    | Yes<br>n=27<br>%                                                  | No<br>n=6<br>% | Not sure<br>n=19<br>% |                        |
| <b>Basic knowledge of tobacco cessation education</b>                                                   |                       |                    |                                                                   |                |                       |                        |
| 1 Population-based trends of tobacco use in Japan                                                       | Related               | 56                 | 70                                                                | 17             | 47                    | 0.04                   |
| 2 Health-related problems of tobacco use                                                                | Related <sup>1)</sup> | 60                 | 78                                                                | 17             | 47                    | 0.01                   |
| 3 Health-related problems of secondhand smoke                                                           | Related               | 56                 | 74                                                                | 17             | 42                    | 0.01                   |
| 4 Forms of tobacco used in Japan                                                                        | None                  | 14                 | 19                                                                | 0              | 11                    | 0.61                   |
| 5 Pharmacologic effects of nicotine                                                                     | listed                | 65                 | 74                                                                | 67             | 53                    | 0.38                   |
| 6 Principles of nicotine addiction                                                                      | listed <sup>2)</sup>  | 52                 | 56                                                                | 50             | 47                    | 0.92                   |
| 7 Aids for cessation (dosing, side effects, etc)                                                        | listed                | 46                 | 63                                                                | 17             | 32                    | 0.04                   |
| 8 Drug interactions associated with smoking                                                             | listed                | 44                 | 67                                                                | 50             | 11                    | <0.001                 |
| 9 Withdrawal effects and health benefits of tobacco cessation                                           | None                  | 39                 | 52                                                                | 33             | 21                    | 0.11                   |
| <b>Practical skills for tobacco cessation education</b>                                                 |                       |                    |                                                                   |                |                       |                        |
| 1 The 5 A's                                                                                             | None                  | 15                 | 30                                                                | 0              | 0                     | 0.01                   |
| 2 The 5 R's                                                                                             | None                  | 15                 | 30                                                                | 0              | 0                     | 0.01                   |
| 3 The brief intervention model (ask, advise, and refer)                                                 | None                  | 10                 | 19                                                                | 0              | 0                     | 0.10                   |
| 4 Tobacco user's readiness to quit smoking                                                              | None                  | 14                 | 22                                                                | 0              | 5                     | 0.24                   |
| 5 Cognitive and behavioural strategies for quitting                                                     | None                  | 10                 | 15                                                                | 0              | 5                     | 0.54                   |
| 6 Motivation Interview for quitting                                                                     | None                  | 10                 | 15                                                                | 0              | 5                     | 0.54                   |
| 7 Counsel patients on proper use of the aids for cessation                                              | Related <sup>3)</sup> | 19                 | 37                                                                | 0              | 0                     | 0.002                  |
| 8 The daily costs of the aids for cessation compared to cigarette smoking                               | None                  | 15                 | 26                                                                | 0              | 5                     | 0.11                   |
| 9 Tailored strategies to assist patients with quitting and following-up based on role-playing scenarios | None                  | 10                 | 15                                                                | 0              | 5                     | 0.37                   |
| 10 Health effects of new tobacco products including heated tobacco products                             | Related <sup>4)</sup> | 14                 | 19                                                                | 0              | 11                    | 0.54                   |

P values are based on between-group differences. Categorical data were examined by Chi-square analysis. Curriculum coverages on tobacco cessation training were examined by one-way ANOVA.

Model Core Curriculum category (Number: title)

- 1) D-(2)-3: Lifestyle Related Diseases and Their Prevention
- 2) E2-(4): Drugs Used for the Treatment of Respiratory and Digestive Tract Disorders
- 3) E2-(9): Over-the-Counter and Behind-the-Counter Drugs and Self-Medication  
F2-(4): Professional Attitudes and Behaviours of Practice, Patient Education, and Counselling  
F-(5)-3: Role of Pharmacists in Primary Care and Self-Medication
- 4) F-(5)-2: Advancing Pharmacy Health Literacy in the Community
